# Supplementary material for: Cardiovascular Adverse Events Associated With BRAF and MEK Inhibitors: A Systematic Review and Meta-analysis
Source: PubMed Central journal article supplement (PMC6692687; doi:10.1001/jamanetworkopen.2019.8890), 2019-08-09
Supplement: jamanetwopen-2-e198890-s001.pdf [file jamanetwopen-2-e198890-s001.pdf]

## Supplementary Online Content

Mincu RI, Mahabadi AA, Michel L, et al. Cardiovascular adverse events associated with BRAF and MEK inhibitors: a systematic review and meta-analysis. *JAMA Netw Open*. 2019;2(8):e198890. doi:10.1001/jamanetworkopen.2019.8890

**eFigure 1.** Overall and Individual Study Estimates of the RR of Pulmonary Embolism and Myocardial Infarction Associated With BRAF and MEK Inhibitor Treatment vs BRAF Inhibitor Monotherapy

**eFigure 2.** Overall and Individual Study Estimates of the RR of Atrial Fibrillation and QTc Interval Prolongation Associated With BRAF and MEK Inhibitor Treatment vs BRAF Inhibitor Monotherapy

**eFigure 3.** The Quality of the Included Studies as Analyzed per Cochrane Handbook Recommendation

**eTable 1.** Search Strategy Through PubMed on November 30, 2018

**eTable 2.** Definition of the End Points According to the National Cancer Institute's Common Terminology Criteria for Adverse Events Version 4

**eTable 3.** Study and Patient Characteristics

### **eReferences**

This supplementary material has been provided by the authors to give readers additional information about their work.

**eFigure 1.** Overall and Individual Study Estimates of the RR of Pulmonary Embolism and Myocardial Infarction Associated With BRAF and MEK Inhibitor Treatment vs BRAF Inhibitor Monotherapy

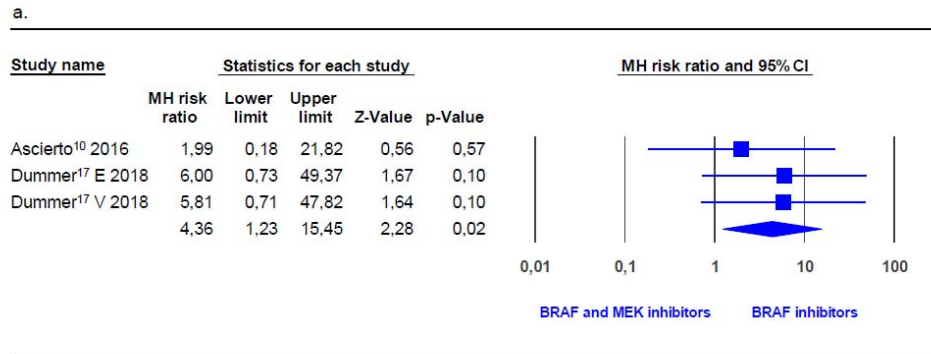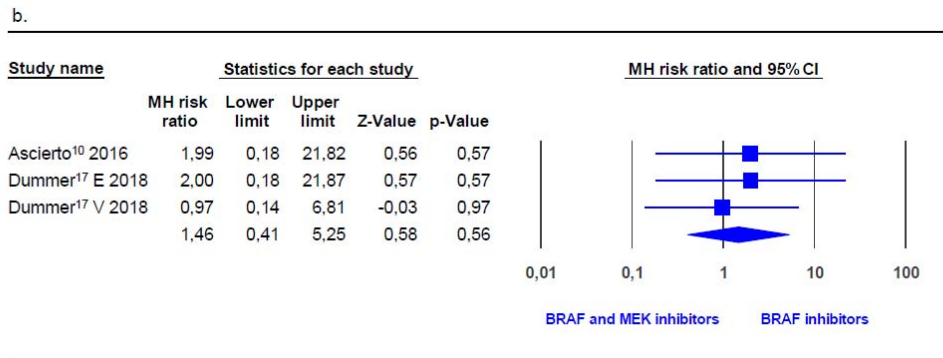

c.

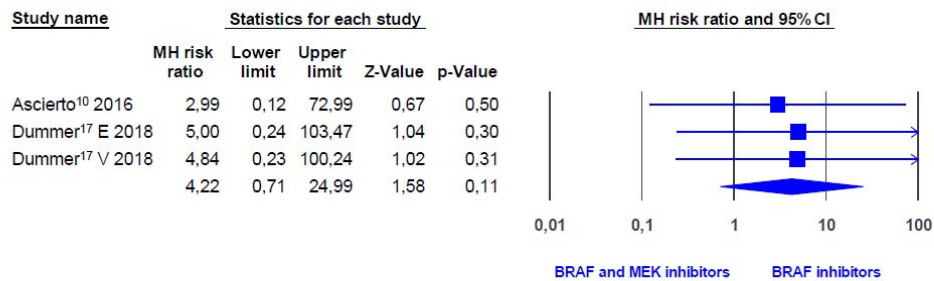

d.

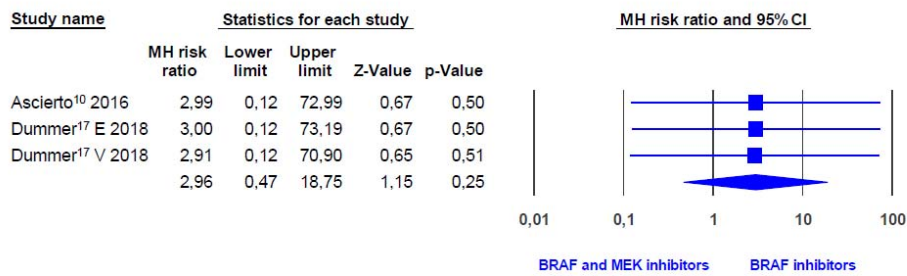

Legend: a. all-grade pulmonary embolism; b. high-grade pulmonary embolism; c. all-grade myocardial infarction; d. high-grade myocardial infarction; RR = risk ratio; BRAF = B-Raf proto-oncogene serine/threonine kinase; MEK = mitogen-activated protein kinase. Square boxes denote the RR for each study and parallelogram boxes denote the overall estimated RR, and horizontal lines represent 95% confidence intervals.

**eFigure 2.** Overall and Individual Study Estimates of the RR of Atrial Fibrillation and QTc Interval Prolongation Associated With BRAF and MEK Inhibitor Treatment vs BRAF Inhibitor Monotherapy

a.

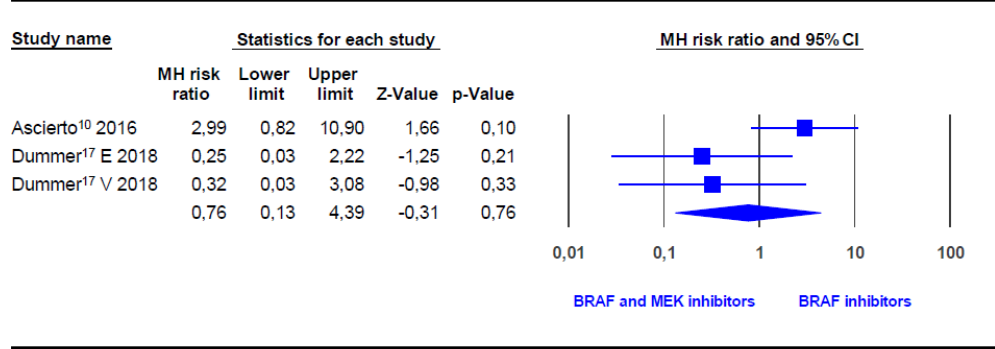

b.

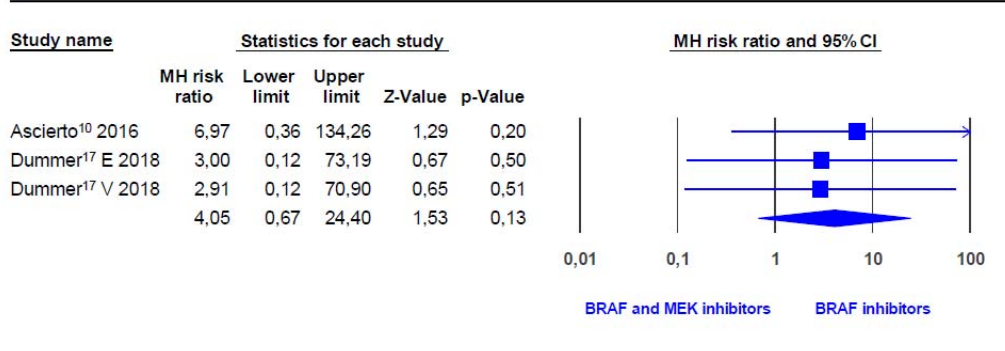

c.

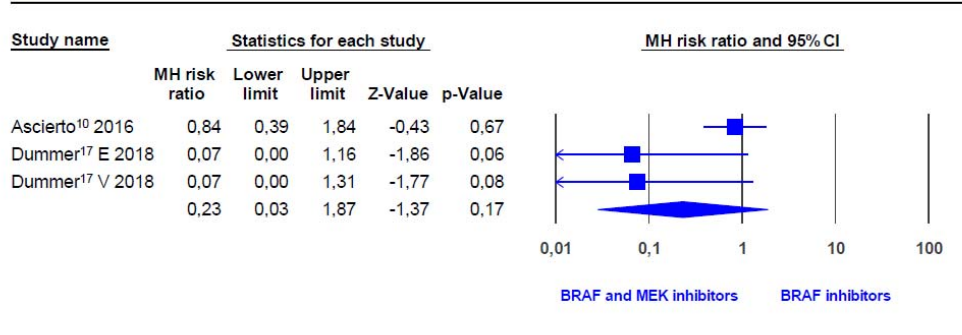

d.

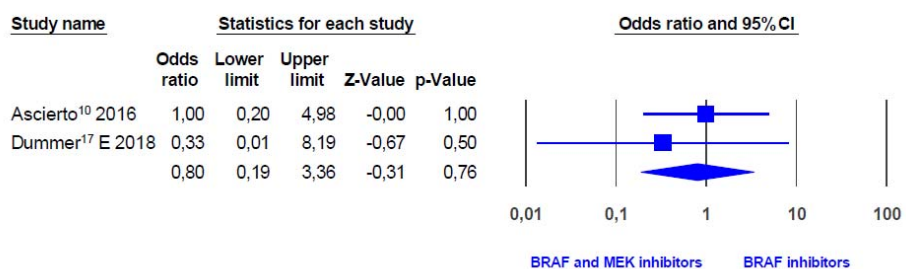

Legend: a. all-grade atrial fibrillation; b. high-grade atrial fibrillation; c. all-grade QTc interval prolongation; d. high-grade QTc interval prolongation; RR = risk ratio; BRAF = B-Raf proto-oncogene serine/threonine kinase; MEK = mitogen-activated protein kinase. Square boxes denote the RR for each study and parallelogram boxes denote the overall estimated RR, and horizontal lines represent 95% confidence intervals.

**eFigure 3.** The Quality of the Included Studies as Analyzed per Cochrane Handbook Recommendation

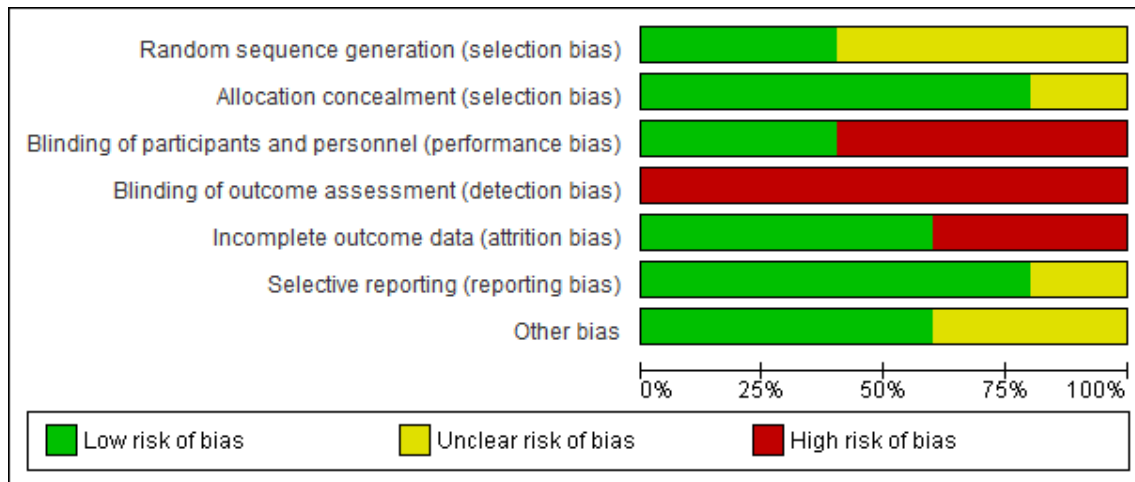

**eTable 1.** Search Strategy Through PubMed on November 30, 2018

| Query                      | Pubmed Publications |
|----------------------------|---------------------|
| Vemurafenib AND melanoma   | 1509                |
| Dabrafenib AND melanoma    | 642                 |
| Encorafenib AND melanoma   | 34                  |
| Trametinib AND melanoma    | 472                 |
| Binimetinib AND melanoma   | 57                  |
| Cobinimetinib AND melanoma | 116                 |
| Total                      | 2830                |

**eTable 2.** Definition of the End Points According to the National Cancer Institute’s Common Terminology Criteria for Adverse Events

Version 4.<sup>1</sup>

High-grade endpoints are defined as grade  $\geq 3$ .

| <b>Endpoint definition</b>                                                                                                 | <b>Grade 1</b>                                                              | <b>Grade 2</b>                                                                                                                                                                                                                                                                                                                                                   | <b>Grade 3</b>                                                                                                                                                                                    | <b>Grade 4</b>                                                                                                                                               | <b>Grade 5</b> |
|----------------------------------------------------------------------------------------------------------------------------|-----------------------------------------------------------------------------|------------------------------------------------------------------------------------------------------------------------------------------------------------------------------------------------------------------------------------------------------------------------------------------------------------------------------------------------------------------|---------------------------------------------------------------------------------------------------------------------------------------------------------------------------------------------------|--------------------------------------------------------------------------------------------------------------------------------------------------------------|----------------|
| <i>Arterial hypertension</i> was defined as a repeatedly elevation in the blood pressure (BP) exceeding 140 over 90 mm Hg. | prehypertension (systolic BP 120 - 139 mm Hg or diastolic BP 80 - 89 mm Hg) | stage 1 hypertension (systolic BP 140 - 159 mm Hg or diastolic BP 90 - 99 mm Hg); medical intervention indicated; recurrent or persistent ( $\geq 24$ hrs); symptomatic increase by $>20$ mm Hg (diastolic) or to $>140/90$ mm Hg if previously WNL; monotherapy indicated Pediatric: recurrent or persistent ( $\geq 24$ hrs) BP $>ULN$ ; monotherapy indicated | stage 2 hypertension (systolic BP $\geq 160$ mm Hg or diastolic BP $\geq 100$ mm Hg); medical intervention indicated; more than one drug or more intensive therapy than previously used indicated | life-threatening consequences (e.g., malignant hypertension, transient or permanent neurologic deficit, hypertensive crisis); urgent intervention indicated. | death          |



|                                                                                                                                                                                                                                                |                                          |                                                                      |                                                                                                             |                                                                      |       |
|------------------------------------------------------------------------------------------------------------------------------------------------------------------------------------------------------------------------------------------------|------------------------------------------|----------------------------------------------------------------------|-------------------------------------------------------------------------------------------------------------|----------------------------------------------------------------------|-------|
| <i>Decrease in the ejection fraction</i> is defined as the drop-in percentage computed when the amount of blood ejected during a ventricular contraction of the heart is compared to the amount that was present prior to the contraction.     | -                                        | resting ejection fraction (EF) 50 - 40%; 10 - 19% drop from baseline | resting ejection fraction (EF) 39 - 20%; >20% drop from baseline                                            | resting ejection fraction (EF) <20%                                  | -     |
| <i>Pulmonary embolism</i> was defined as partial or total occlusion of the pulmonary artery and branches by thrombosis.                                                                                                                        | intervention not indicated.              | minimal, local or noninvasive intervention indicated                 | medical intervention indicated                                                                              | hemodynamic or neurologic instability; urgent intervention indicated | death |
| <i>Atrial fibrillation</i> is defined as a disorder characterized by a dysrhythmia without discernible P waves and an irregular ventricular response due to multiple reentry circuits. The rhythm disturbance originates above the ventricles. | asymptomatic, intervention not indicated | non-urgent medical intervention indicated                            | symptomatic and incompletely controlled medically, or controlled with device (e.g., pacemaker), or ablation | life-threatening consequences; urgent intervention indicated         | death |

|                                                                                                                                                                      |                  |                                                                                             |                                                                                                           |                                                                                                                                                |       |
|----------------------------------------------------------------------------------------------------------------------------------------------------------------------|------------------|---------------------------------------------------------------------------------------------|-----------------------------------------------------------------------------------------------------------|------------------------------------------------------------------------------------------------------------------------------------------------|-------|
|                                                                                                                                                                      |                  |                                                                                             |                                                                                                           |                                                                                                                                                |       |
| <i>Prolongation of QTc interval</i> is defined as a finding of a cardiac dysrhythmia characterized by an abnormally long corrected QT interval.                      | QTc 450 - 480 ms | QTc 481 - 500 ms                                                                            | QTc ≥ 501 ms on at least two separate ECGs                                                                | QTc ≥ 501 or >60 ms change from baseline and Torsade de pointes or polymorphic ventricular tachycardia or signs/symptoms of serious arrhythmia | -     |
| <i>Myocardial infarction</i> is defined as a disorder characterized by gross necrosis of the myocardium; this is due to an interruption of blood supply to the area. | -                | asymptomatic and cardiac enzymes minimally abnormal and no evidence of ischemic ECG changes | severe symptoms; cardiac enzymes abnormal; hemodynamically stable; ECG changes consistent with infarction | life-threatening consequences; hemodynamically unstable                                                                                        | death |

**eTable 3.** Study and Patient Characteristics

| Study Characteristic                                         | Studies, No. | Patients, No |
|--------------------------------------------------------------|--------------|--------------|
| Total                                                        | 5            | 2317         |
| Phase                                                        |              |              |
| 2                                                            | 1            | 108          |
| 3                                                            | 4            | 2209         |
| Median age, y                                                |              |              |
| ≤ 55                                                         | 2            | 812          |
| > 55                                                         | 3            | 1505         |
| Melanoma status                                              |              |              |
| Stage ≥ IIIB<br>unresectable                                 | 5            | 2317         |
| Regimen                                                      |              |              |
| Dabrafenib +Trametanib<br>vs. Dabrafenib                     | 2            | 531          |
| Dabrafenib +Trametanib<br>vs. Vemurafenib                    | 1            | 704          |
| Vemurafenib+Cobimetinib<br>vs. Vemurafenib or<br>Encorafenib | 1            | 495          |
| Encorafenib+Binimetinib<br>vs. Vemurafenib                   | 1            | 577          |
| Median follow-up                                             |              |              |
| ≤ 15 Months                                                  | 3            | 1307         |
| > 15 Months                                                  | 2            | 1010         |

## eReferences

1. National Cancer Institute's Common Toxicity Criteria (version 4) 2009; [https://evs.nci.nih.gov/ftp1/CTCAE/CTCAE\\_4.03\\_2010-06-14\\_QuickReference\\_5x7.pdf](https://evs.nci.nih.gov/ftp1/CTCAE/CTCAE_4.03_2010-06-14_QuickReference_5x7.pdf).
